# Supplementary material for: The Teamwork Assessment Scale: A Novel Instrument to Assess Quality of Undergraduate Medical Students' Teamwork Using the Example of Simulation-based Ward-Rounds
Source: PubMed Central journal article supplement (PMC4446650; doi:10.3205/zma000961), 2015-05-13
Supplement: ZMA-32-19-s-001.pdf [file ZMA-32-19-s-001.pdf]

## Attachment 1: Example of the coding scheme used for scenario one

|                                                                                                                                  |     |    |
|----------------------------------------------------------------------------------------------------------------------------------|-----|----|
| Part 1: Resident gives relevant medical information to senior physician                                                          | Yes | No |
| Part 2: Nurse complements the doctor's report                                                                                    | Yes | No |
| Part 3: Patient is asked questions (and examined) by the resident.                                                               | Yes | No |
| Part 4: Resident and senior physician discuss the treatment plan with each other and then with the patient.                      | Yes | No |
| Sequence of activities: Part 1-4 were carried out in correct order                                                               | Yes | No |
| Roles: Every person acted concurrent to their role<br>nurse as nurse, resident as resident, senior physician as senior physician | Yes | No |
| Objectives: The objective of the scenario was fulfilled                                                                          |     |    |
| Scenario 1: Resident states T-negativations of the patient                                                                       | Yes | No |
