# Supplementary material for: The Teamwork Assessment Scale: A Novel Instrument to Assess Quality of Undergraduate Medical Students' Teamwork Using the Example of Simulation-based Ward-Rounds
Source: PubMed Central journal article supplement (PMC4446650; doi:10.3205/zma000961), 2015-05-13
Supplement: ZMA-32-19-s-002.pdf [file ZMA-32-19-s-002.pdf]

Attachment 2: Teamwork Assessment Scale (TAS) with a 5 point Likert-scale

# TEAMWORK ASSESSMENT SCALE

J. KIESEWETTER<sup>\*,+</sup>, M.R. FISCHER<sup>\*</sup>

<sup>\*</sup>INSTITUT FÜR DIDAKTIK UND AUSBILDUNGSFORSCHUNG IN DER MEDIZIN, KLINIKUM DER LMU MÜNCHEN

+MUNICH CENTER OF THE LEARNING SCIENCES, LMU MÜNCHEN

|                                                                                             | Completely Disagree |   |   | Completely Agree |   |
|---------------------------------------------------------------------------------------------|---------------------|---|---|------------------|---|
| The team roles were distinct without ambiguity.                                             | ①                   | ② | ③ | ④                | ⑤ |
| A team leader was clearly established.                                                      | ①                   | ② | ③ | ④                | ⑤ |
| The team leader was accepted by all team members.                                           | ①                   | ② | ③ | ④                | ⑤ |
| None of the team members switched their role.                                               | ①                   | ② | ③ | ④                | ⑤ |
| The team leader was always open to the team's suggestions.                                  | ①                   | ② | ③ | ④                | ⑤ |
| The plan for treatment was communicated to all team members.                                | ①                   | ② | ③ | ④                | ⑤ |
| The team leader's instructions were always explicit and directed.                           | ①                   | ② | ③ | ④                | ⑤ |
| The team leader always reassured that his instructions were understood.                     | ①                   | ② | ③ | ④                | ⑤ |
| The team members mutually pointed out errors in a very constructive way.                    | ①                   | ② | ③ | ④                | ⑤ |
| The team members shared all the information necessary to successfully handle the situation. | ①                   | ② | ③ | ④                | ⑤ |
| When the situation changed, the whole team adapted quickly to the new circumstances.        | ①                   | ② | ③ | ④                | ⑤ |
| When a team member needed help, variable team members helped.                               | ①                   | ② | ③ | ④                | ⑤ |
| In situations where a team member needed help, it was not given to them.                    | ①                   | ② | ③ | ④                | ⑤ |
| In conflict situations, team members who were not involved tried to mediate.                | ①                   | ② | ③ | ④                | ⑤ |
